# Supplementary material for: The near-atomic cryoEM structure of a flexible filamentous plant virus shows homology of its coat protein with nucleoproteins of animal viruses
Source: eLife journal article supplement (doi:10.7554/elife.11795), 2015-12-16
Supplement: supp [file elife-11795-supp-v2.zip]

|                       |        |                                      |
|-----------------------|--------|--------------------------------------|
| Clashscore, all atoms | 1.76   | 100th/99th percentiles <sup>1*</sup> |
| MolProbity score      | 1.52   | 100th/95th percentiles <sup>2*</sup> |
| Ramachandran outliers | 6      | 2.79 %                               |
| Bad Backbone bones    | 0/1673 | 0.00 %                               |
| Bad backbone angles   | 0/2279 | 0.00 %                               |

1\* 100th percentile compared with N=37 atomic structures with resolution >3Å, and 99th with N=1784 structures in all the range of resolutions.

2\* 100th percentile compared with N=342 atomic structures with resolution range 3.25-4.25 Å, and 95th with N=27675 structures in all the range of resolutions.
