# Supplementary figures and images for: The near-atomic cryoEM structure of a flexible filamentous plant virus shows homology of its coat protein with nucleoproteins of animal viruses
Source: eLife journal article supplement (doi:10.7554/elife.11795), 2015-12-16

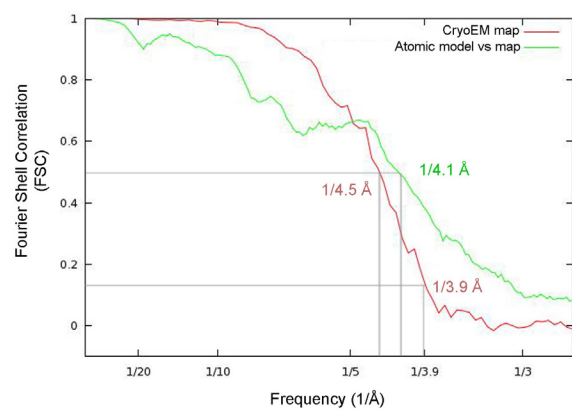

Supplement: supp [file elife-11795-supp-v2.zip]

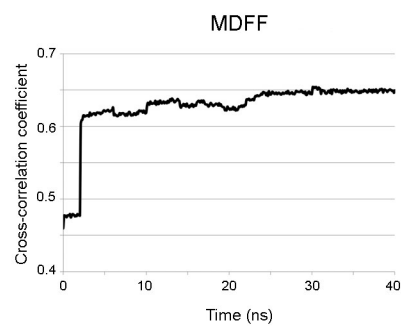

Supplement: supp [file elife-11795-supp-v2.zip]

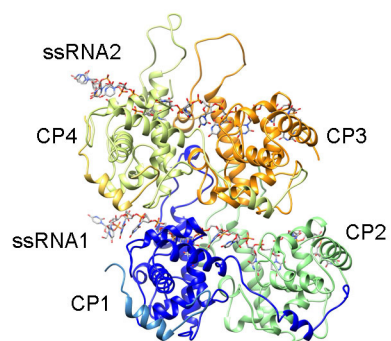

Supplement: supp [file elife-11795-supp-v2.zip]

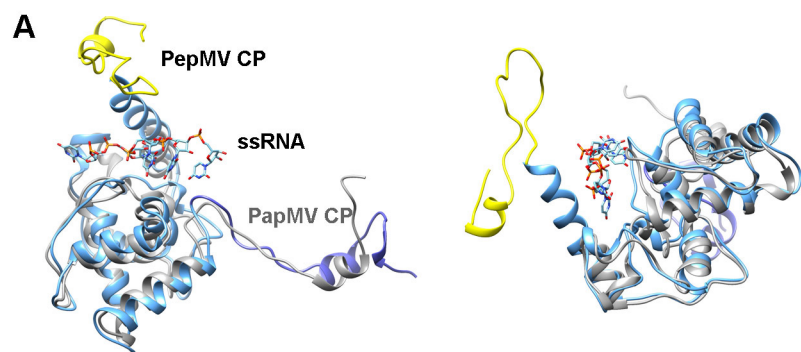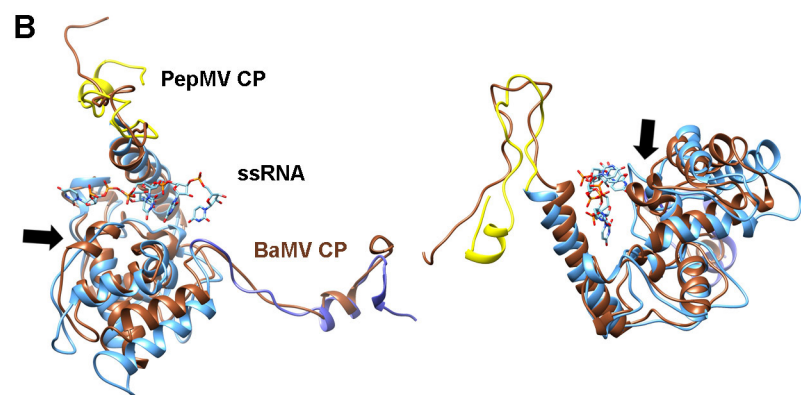

Supplement: supp [file elife-11795-supp-v2.zip]

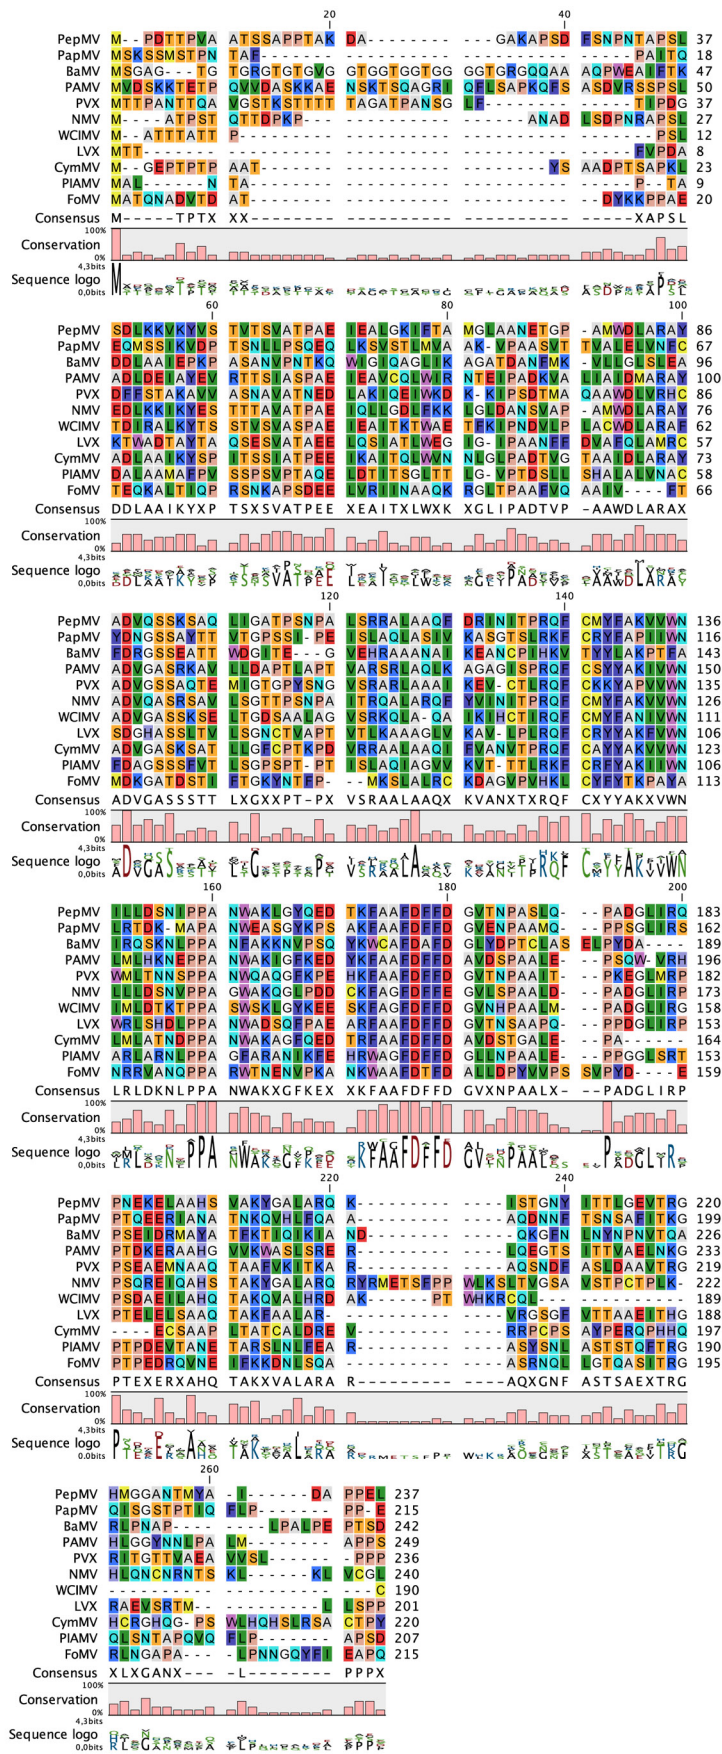

Supplement: supp [file elife-11795-supp-v2.zip]

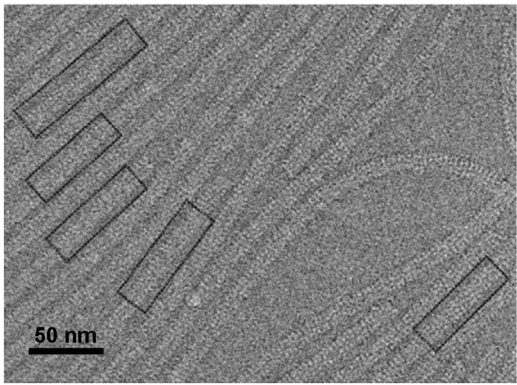

Supplement: supp [file elife-11795-supp-v2.zip]

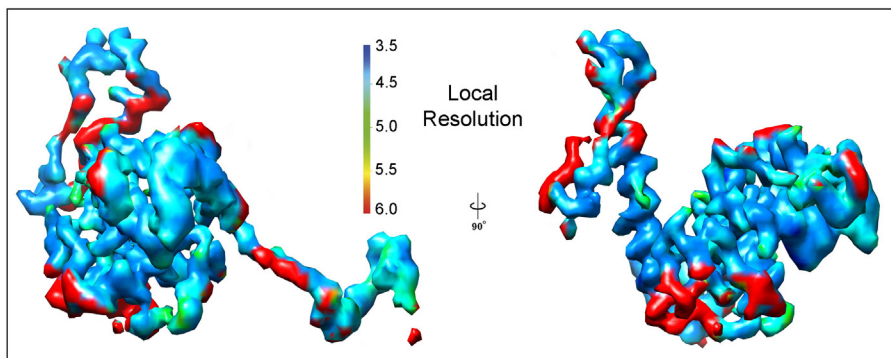

Supplement: supp [file elife-11795-supp-v2.zip]

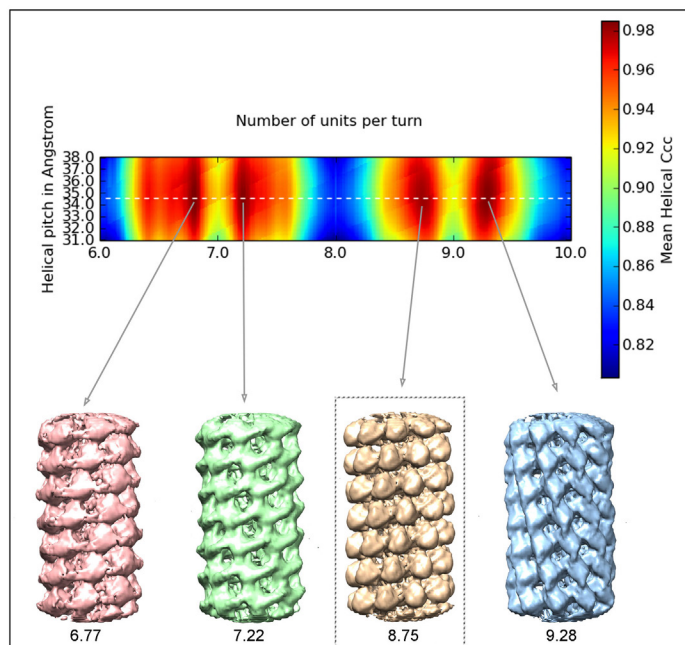

Supplement: supp [file elife-11795-supp-v2.zip]
